# Supplementary material for: Ferrocenyl BODIPYs: synthesis, structure and properties
Source: Royal Society of Chemistry journal article supplement (doi:10.1039/c2ra21964f), 2012-01-01
Supplement: c2ra21964f.pdf [file c2ra21964f.pdf]

## Supporting Information

### Ferrocenyl BODIPYs: Synthesis, Structure and Properties

Prabhat Gautam, Bhausaheb Dhokale, Shaikh M. Mobin and Rajneesh Misra\*

Department of Chemistry,  
Indian Institute of Technology Indore,  
Indore- 452 017, India.

[rajneeshmisra@iiti.ac.in](mailto:rajneeshmisra@iiti.ac.in)

#### Table of Contents

|                                                                                                        |            |
|--------------------------------------------------------------------------------------------------------|------------|
| <b>I. Experimental details</b> .....                                                                   | <b>S2</b>  |
| <b>II. Crystallographic data</b> .....                                                                 | <b>S4</b>  |
| <b>III. Electrochemical Data for 3a-3d</b> .....                                                       | <b>S10</b> |
| <b>IV. Copies of <sup>1</sup>H NMR, <sup>13</sup>C NMR and HRMS Spectra of the New Compounds</b> ..... | <b>S12</b> |

**General:** Chemicals were used as received unless otherwise indicated. All oxygen or moisture sensitive reactions were performed under nitrogen/argon atmosphere using standard schlenk method. Triethylamine (TEA) was received from commercial source, and distilled on KOH prior to use.  $^1\text{H}$  NMR (400 MHz), and  $^{13}\text{C}$  NMR (100MHz) spectra were recorded on the Bruker Avance (III) 400 MHz, using  $\text{CDCl}_3$  as solvent. Tetramethylsilane (TMS) was used as reference for recording  $^1\text{H}$  (of residual proton;  $\delta = 7.26$  ppm), and  $^{13}\text{C}$  ( $\delta = 77.0$  ppm) spectra in  $\text{CDCl}_3$ . UV-visible absorption spectra of all compounds in toluene were recorded on a Carry-100 Bio UV-visible Spectrophotometer. Cyclic voltamograms (CVs) were recorded on a CHI620D electrochemical analyzer using Glassy carbon as working electrode, Pt wire as the counter electrode, and Saturated Calomel Electrode (SCE) as the reference electrode. HRMS was recorded on Bruker-Daltonics, micrO TOF-Q II mass spectrometer.

**General procedure for synthesis of 3a-3d.** 2,6-diiodo BODIPY **2** (0.087 mmol),  $\text{Pd}(\text{PPh}_3)_2\text{Cl}_2$  (0.005 mmol), and  $\text{CuI}$  (0.01 mmol) were dissolved in THF (10ml), and  $\text{Et}_3\text{N}$  (10ml) in 1:1 ratio. The mixture was degassed with Ar for 45 min. Appropriate ferrocenyl alkyne intermediate (0.261 mmol) was added to the solution, and the resulting mixture was stirred for 12 h at  $60^\circ\text{C}$ . Upon completion, the mixture was evaporated to dryness, and the crude product was dissolved in  $\text{CH}_2\text{Cl}_2$ , and then passed through a pad of silica to remove insoluble material. The filtrate was evaporated to dryness, and the crude product was chromatographed on silica (1:1 hexanes/ $\text{CH}_2\text{Cl}_2$ ), and finally recrystallized from chloroform: ethanol mixture to give **3a-3d** (yield 40-60%) crystalline solid.

**3a:** purple solid (39 mg, Yield: 60%).  $^1\text{H}$  NMR (400 MHz,  $\text{CDCl}_3$ ):  $\delta = 7.52\text{-}7.51$  (m, 3H), 7.30-7.27 (m, 2H), 4.44 (s, 4H), 4.22-4.19 (m, 14), 2.69 (s, 6H), 1.49 (s, 6H);  $^{13}\text{C}$  NMR (100 MHz,  $\text{CDCl}_3$ ):  $\delta = 158.1$ , 148.0, 143.4, 142.0, 134.8, 131.2, 129.3, 127.9, 116.9, 95.1, 77.5, 71.5, 70.0, 68.9, 65.4, 13.7, 13.5; HRMS ( $\text{C}_{43}\text{H}_{35}\text{BF}_2\text{Fe}_2\text{N}_2$ ) calcd 740.1564 [ $\text{M}^+$ ], found 740.1571 [ $\text{M}^+$ ]; UV/Vis (toluene):  $\lambda_{\text{max}}$  ( $\epsilon$  [ $\text{M}^{-1}\text{cm}^{-1}$ ]) 583 nm (15500); X-ray: see Figure 3.

**3b:** purple solid (30 mg, Yield: 40%).  $^1\text{H}$  NMR (400 MHz,  $\text{CDCl}_3$ ):  $\delta = 7.54\text{-}7.51$  (m, 5H), 7.36 (d, 4H,  $J = 8\text{Hz}$ ), 7.31-7.28 (m, 4H), 4.69 (s, 4H), 4.38 (s, 4H), 4.06 (s, 10H), 2.73 (s, 6H), 1.24 (s, 6H); HRMS ( $\text{C}_{55}\text{H}_{43}\text{BF}_2\text{Fe}_2\text{N}_2$ ) calcd 892.2192 [ $\text{M}^+$ ], found 892.2214 [ $\text{M}^+$ ]; UV/Vis (toluene):  $\lambda_{\text{max}}$  ( $\epsilon$  [ $\text{M}^{-1}\text{cm}^{-1}$ ]) 590 (42800); X-ray: see Figure 3. Due to poor solubility of this compound the  $^{13}\text{C}$  NMR could not be obtained.

**3c:** purple solid (38 mg, Yield: 50%).  $^1\text{H}$  NMR (400 MHz,  $\text{CDCl}_3$ ):  $\delta = 7.56\text{-}7.53$  (m, 5H), 7.5 (s, 2H), 7.39 (d, 2H,  $J = 8\text{Hz}$ ), 7.33-7.30 (m, 2H), 7.22 (d, 2H,  $J = 8\text{Hz}$ ), 4.67 (s, 4H), 4.35 (s, 4H), 4.07 (s, 10H), 2.75 (s, 6H), 1.55 (s, 6H).  $^{13}\text{C}$  NMR (100 MHz,  $\text{CDCl}_3$ ):  $\delta = 158.5, 144.1, 142.5, 141.8, 139.8, 134.5, 131.3, 129.4, 128.9, 128.6, 128.4, 127.9, 126.1, 123.4, 116.3, 96.7, 84.5, 81.4, 69.7, 69.2, 66.6, 13.8, 13.5$ ; HRMS ( $\text{C}_{55}\text{H}_{43}\text{BF}_2\text{Fe}_2\text{N}_2$ ) calcd 892.2192 [ $\text{M}^+$ ], found 892.2198 [ $\text{M}^+$ ]; UV/Vis (toluene):  $\lambda_{\text{max}}$  ( $\epsilon$  [ $\text{M}^{-1}\text{cm}^{-1}$ ]) 576 (69600).

**3d:** purple solid (45 mg, Yield: 55%).  $^1\text{H}$  NMR (400 MHz,  $\text{CDCl}_3$ ):  $\delta = 7.54\text{-}7.53$  (m, 3H), 7.45-7.37 (m, 8H), 7.31-7.28 (m, 2H), 4.49 (s, 4H), 4.25-4.23 (m, 14H), 2.72 (s, 6H), 1.52 (s, 6H);  $^{13}\text{C}$  NMR (100 MHz,  $\text{CDCl}_3$ ):  $\delta = 157.6, 147.7, 143.7, 141.1, 134.4, 131.3, 131.2, 129.4, 127.9, 123.7, 122.5, 116.2, 101.8, 96.5, 90.6, 85.6, 83.3, 71.5, 70.0, 69.0, 64.9, 13.8, 13.4$ ; HRMS ( $\text{C}_{59}\text{H}_{43}\text{BF}_2\text{Fe}_2\text{N}_2$ ) calcd 940.2193 [ $\text{M}^+$ ], found 940.2191 [ $\text{M}^+$ ]; UV/Vis (toluene):  $\lambda_{\text{max}}$  ( $\epsilon$  [ $\text{M}^{-1}\text{cm}^{-1}$ ]) 586 (696200).

## II. Crystallographic data

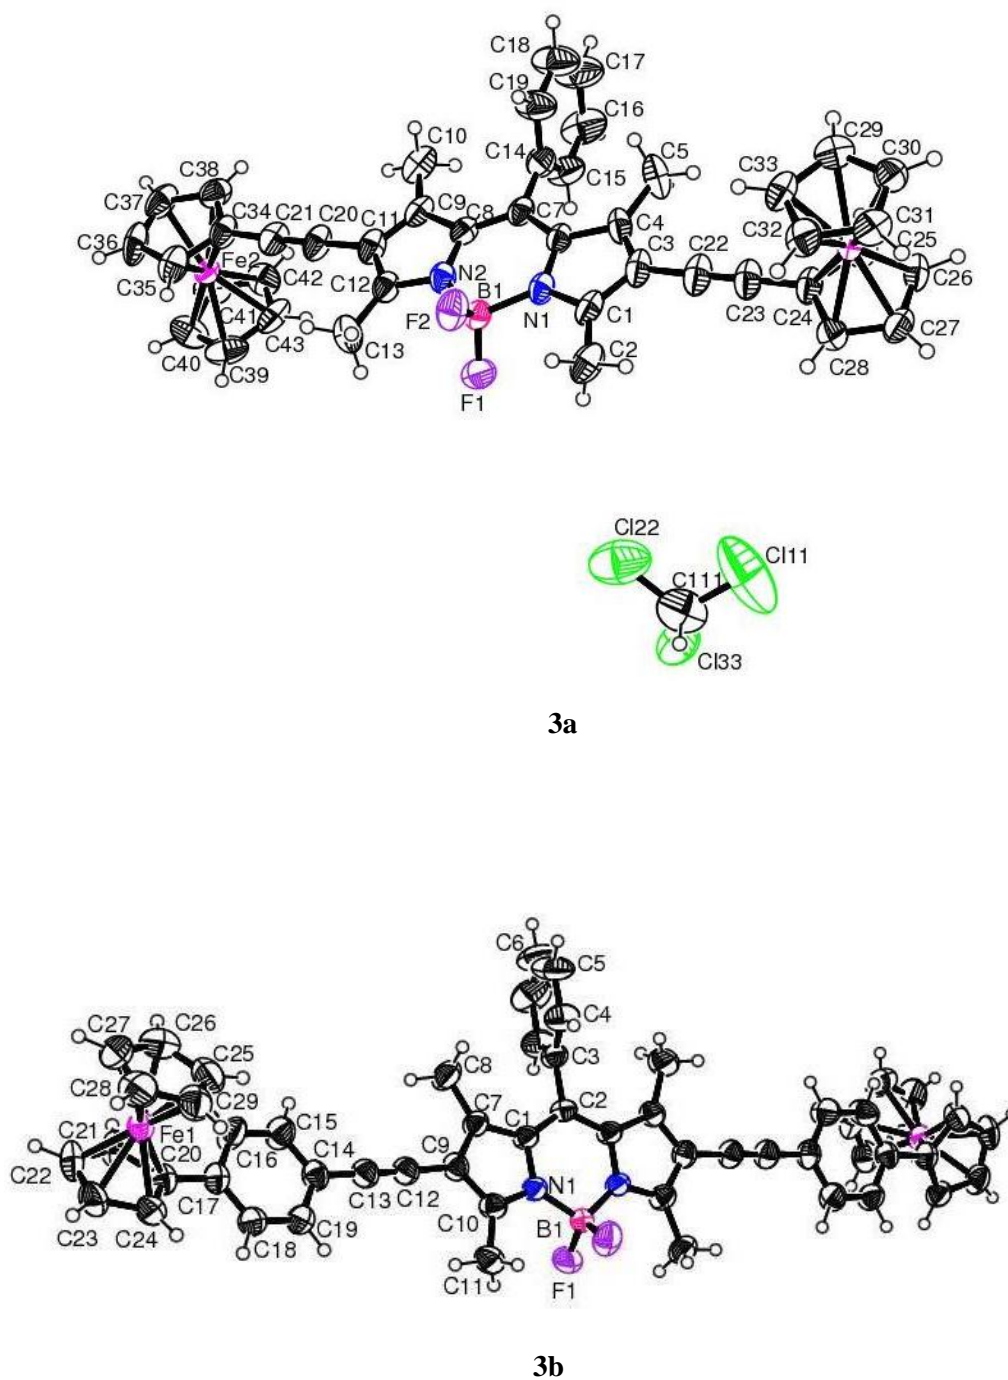

**Figure S1.** ORTEP view of **3a** and **3b**, and the atom-labelling scheme. Thermal ellipsoids are plotted at the 50 % level.

**Table S1.** Selected bond lengths [Å] and bond angles [°] for BODIPYs **3a** and **3b**.

| Bond lengths [Å] |          | Bond angles [°] |          |
|------------------|----------|-----------------|----------|
| For <b>3a</b>    |          |                 |          |
| B1-F1            | 1.372(7) | N1-B1-N2        | 105.6(4) |
| B1-F2            | 1.407(7) | F1-B1-F2        | 109.0(5) |
| B1-N1            | 1.557(7) | N1-B1-F1        | 111.1(5) |
| B1-N2            | 1.544(7) | N2-B1-F2        | 110.2(4) |
| N1-C1            | 1.357(6) | N1-B1-F2        | 109.3(4) |
| N1-C6            | 1.406(6) | N2-B1-F1        | 111.5(5) |
| N2-C8            | 1.412(6) |                 |          |
| N2-C12           | 1.361(6) |                 |          |
| C22-C23          | 1.187(8) |                 |          |
| C20-C21          | 1.194(8) |                 |          |
| For <b>3b</b>    |          |                 |          |
| B1-F1            | 1.375(4) | N1-B1-N1        | 107.4(4) |
| B1-N1            | 1.537(4) | N1-B1-F1        | 109.9(4) |
| N1-C1            | 1.407(4) | F1-B1-F1        | 110.2(4) |

**Table S2.** Bond angle and bond distance for intermolecular interactions in **3b**.

| No.       | Intermolecular interaction                                 | H...A Distance (Å) | D...H...A Angle (°) |
|-----------|------------------------------------------------------------|--------------------|---------------------|
| <b>3a</b> | C-H...F (C111-H111...F2 <sup>*</sup> )                     | 2.46(3)            | 141(7)              |
| <b>3b</b> |                                                            |                    |                     |
| 1         | C-H...F (C6-H6...F1 <sup>**</sup> )                        | 2.59(2)            | 154(4)              |
| 2         | C-H... $\pi$ (C4-H4...C25,C26,C27,C28,C29 <sup>***</sup> ) | 2.83(3)            | 151(1)              |

<sup>\*</sup> F1 at equivalent position (1-x, 1-y, 1-z); <sup>\*\*</sup> F1 at equivalent position (x, -1+y, z); <sup>\*\*\*</sup> (C25,C26,C27,C28,C29) at equivalent position (2-x, y, 3/2-z).

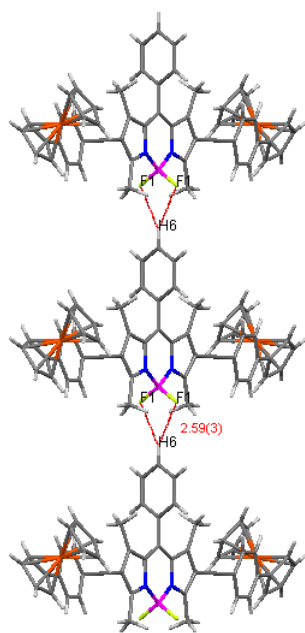

(a)

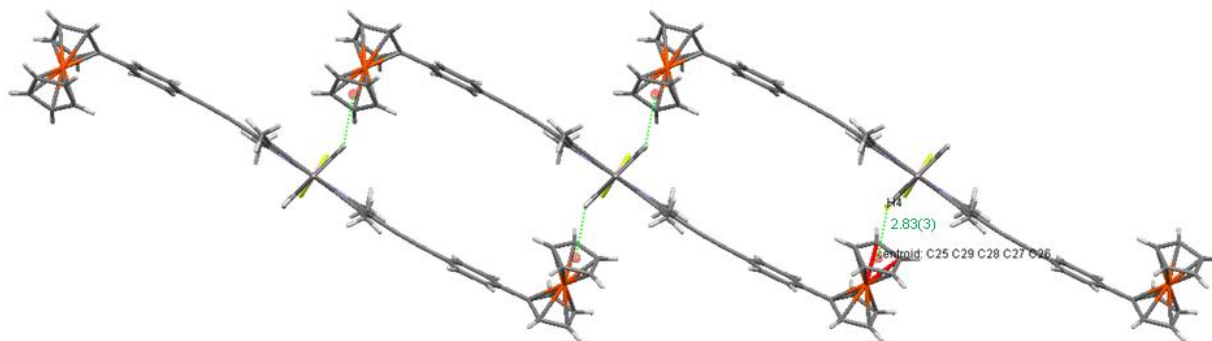

(b)

**Figure S2a.** Crystal structure of **3b** showing intermolecular C-H...F interactions (a) along the *c*-axis, and C-H... $\pi$  interactions along the *b*-axis.

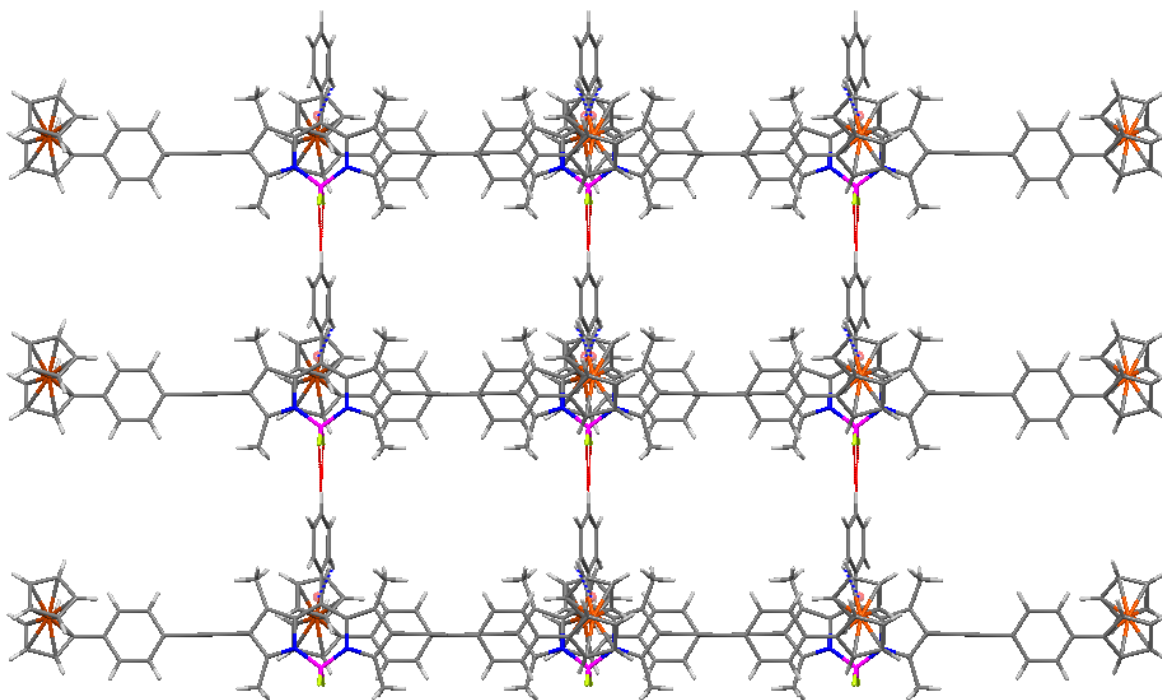

**Figure S2b.** Crystal structure of **3b** showing intermolecular C-H...F, and C-H... $\pi$  interactions in 2D network.

Single crystal X-ray structural studies of **3a** and **3b** were performed on a CCD Agilent Technologies (Oxford Diffraction) SUPER NOVA diffractometer. Data were collected at 293(2) K using graphite-monochromated Mo K $\alpha$  radiation ( $\lambda_{\alpha} = 0.71073 \text{ \AA}$ ). The strategy for the Data collection was evaluated by using the CrysAlisPro CCD software. The data were collected by the standard 'phi-omega scan techniques, and were scaled and reduced using CrysAlisPro RED software. The structures were solved by direct methods using SHELXS-97, and refined by full matrix least-squares with SHELXL-97, refining on  $F^2$ .<sup>1</sup> The positions of all the atoms were obtained by direct methods. All non-hydrogen atoms were refined anisotropically. The remaining hydrogen atoms were placed in geometrically constrained

positions, and refined with isotropic temperature factors, generally  $1.2U_{eq}$  of their parent atoms. The crystal, and refinement data are summarized in Table 1. The CCDC numbers **891093** and **891094** contain the supplementary crystallographic data for **3a** and **3b** respectively. These data can be obtained free of charge via [www.ccdc.cam.ac.uk](http://www.ccdc.cam.ac.uk) (or from the Cambridge Crystallographic Data Centre, 12 union Road, Cambridge CB21 EZ, UK; Fax: (+44) 1223-336-033; or [deposit@ccdc.cam.ac.uk](mailto:deposit@ccdc.cam.ac.uk)).

**Table S3.** Crystal data and refinement parameters for the BODIPY dyes **3a** and **3b**

|                                                  | <b>3a</b>                                                                                       | <b>3b</b>                                                                       |
|--------------------------------------------------|-------------------------------------------------------------------------------------------------|---------------------------------------------------------------------------------|
| <b>Empirical formula</b>                         | C <sub>44</sub> H <sub>36</sub> B Cl <sub>3</sub> F <sub>2</sub> Fe <sub>2</sub> N <sub>2</sub> | C <sub>55</sub> H <sub>43</sub> B F <sub>2</sub> Fe <sub>2</sub> N <sub>2</sub> |
| <b>Formula weight (g mol<sup>-1</sup>)</b>       | 859.61                                                                                          | 892.42                                                                          |
| <b>Crystal size (mm)</b>                         | 0.23 x 0.18 x 0.13                                                                              | 0.30 x 0.24 x 0.18                                                              |
| <b>Crystal system</b>                            | Monoclinic                                                                                      | Monoclinic                                                                      |
| <b>Space group</b>                               | <i>P2<sub>1</sub>/c</i>                                                                         | <i>C2/c</i>                                                                     |
| <b>Z</b>                                         | 4                                                                                               | 4                                                                               |
| <b>a/ (Å)</b>                                    | 12.2026(10)                                                                                     | 29.777(3)                                                                       |
| <b>b/ (Å)</b>                                    | 15.5375(13)                                                                                     | 11.2969(6)                                                                      |
| <b>c/ (Å)</b>                                    | 20.834(2)                                                                                       | 14.2126(10)                                                                     |
| <b>α/(°)</b>                                     | 90                                                                                              | 90.00                                                                           |
| <b>β/(°)</b>                                     | 90.456(8)                                                                                       | 117.784(10)                                                                     |
| <b>γ/(°)</b>                                     | 90                                                                                              | 90.00                                                                           |
| <b>Volume /(Å<sup>3</sup>)</b>                   | 3950.0(6)                                                                                       | 4229.8(5)                                                                       |
| <b>Calculated density/ (Mg m<sup>-3</sup>)</b>   | 1.445 Mg/m <sup>-3</sup>                                                                        | 1.401 Mg/m <sup>-3</sup>                                                        |
| <b>Absorption coefficient /(mm<sup>-1</sup>)</b> | 0.981                                                                                           | 0.737                                                                           |
| <b>T (K)</b>                                     | 293(2)                                                                                          | 150(2) K                                                                        |



---

|                                                                |                                    |                                    |
|----------------------------------------------------------------|------------------------------------|------------------------------------|
| <b><i>F</i>(000)</b>                                           | 1760                               | 1848                               |
| <b><math>\theta</math> range for data collection/(°)</b>       | 3.11 to 25.00                      | 2.94 to 25.00                      |
| <b>Total reflections measured</b>                              | 29958                              | 19402                              |
| <b>Independent reflections [R(int)]</b>                        | 6955 [0.1052]                      | 3717 [0.0760]                      |
| <b>Completeness to <math>\theta</math>max</b>                  | $\theta = 25.00$ ; 99.8 %          | $\theta = 25.00$ ; 99.8 %          |
| <b>Refinement method</b>                                       | Full-matrix least-squares on $F^2$ | Full-matrix least-squares on $F^2$ |
| <b>Data / Restraints /</b>                                     | 6955 / 0 / 491                     | 3717 / 0 / 284                     |
| <b>Parameters</b>                                              |                                    |                                    |
| <b>Final <i>R</i> indices [<math>I &gt; 2\sigma(I)</math>]</b> | R1 = 0.0826                        | R1 = 0.0529                        |
|                                                                | wR2 = 0.2261                       | wR2 = 0.1379                       |
| <b><i>R</i> indices all data</b>                               | R1 = 0.1026                        | R1 = 0.0841                        |
|                                                                | wR2 = 0.2555                       | wR2 = 0.1646                       |
| <b>Goodness-of-fit on <math>F^2</math></b>                     | 1.070                              | 1.060                              |
| <b>Largest diff. peak and hole (eÅ<sup>-3</sup>)</b>           | 1.105 and -0.953                   | 0.291 and -0.368                   |

---

**Electrochemical Data for 1 , and 3a-3d.**

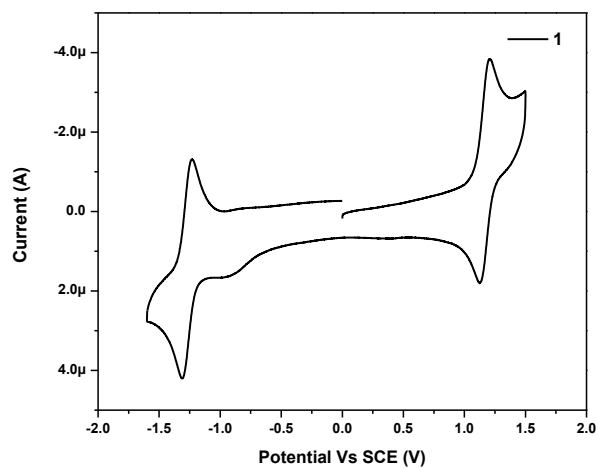

**Figure S3.** Cyclic voltammogram of BODIPY 1.

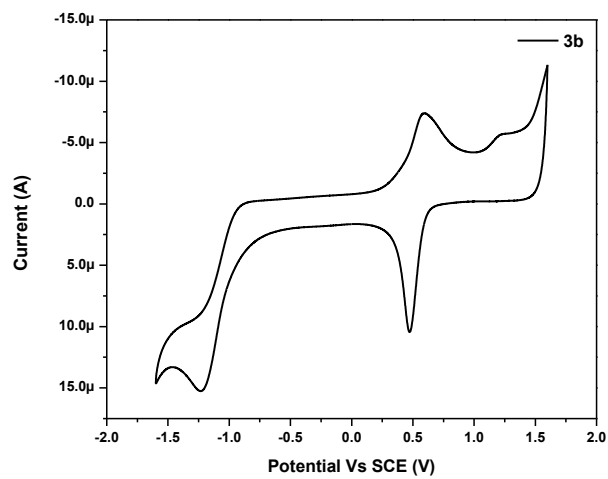

**Figure S5.** Cyclic voltammogram of BODIPY 3b.

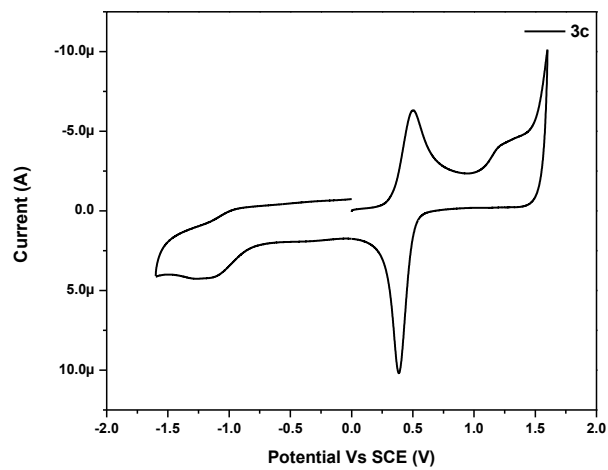

**Figure S6.** Cyclic voltammogram of BODIPY 3c.

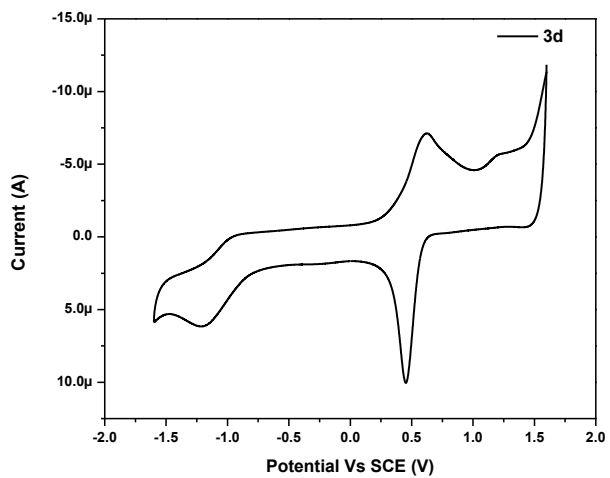

**Figure S7.** Cyclic voltammogram of BODIPY 3d.

### Copies of $^1\text{H}$ NMR, $^{13}\text{C}$ NMR and HRMS Spectra of the New Compounds

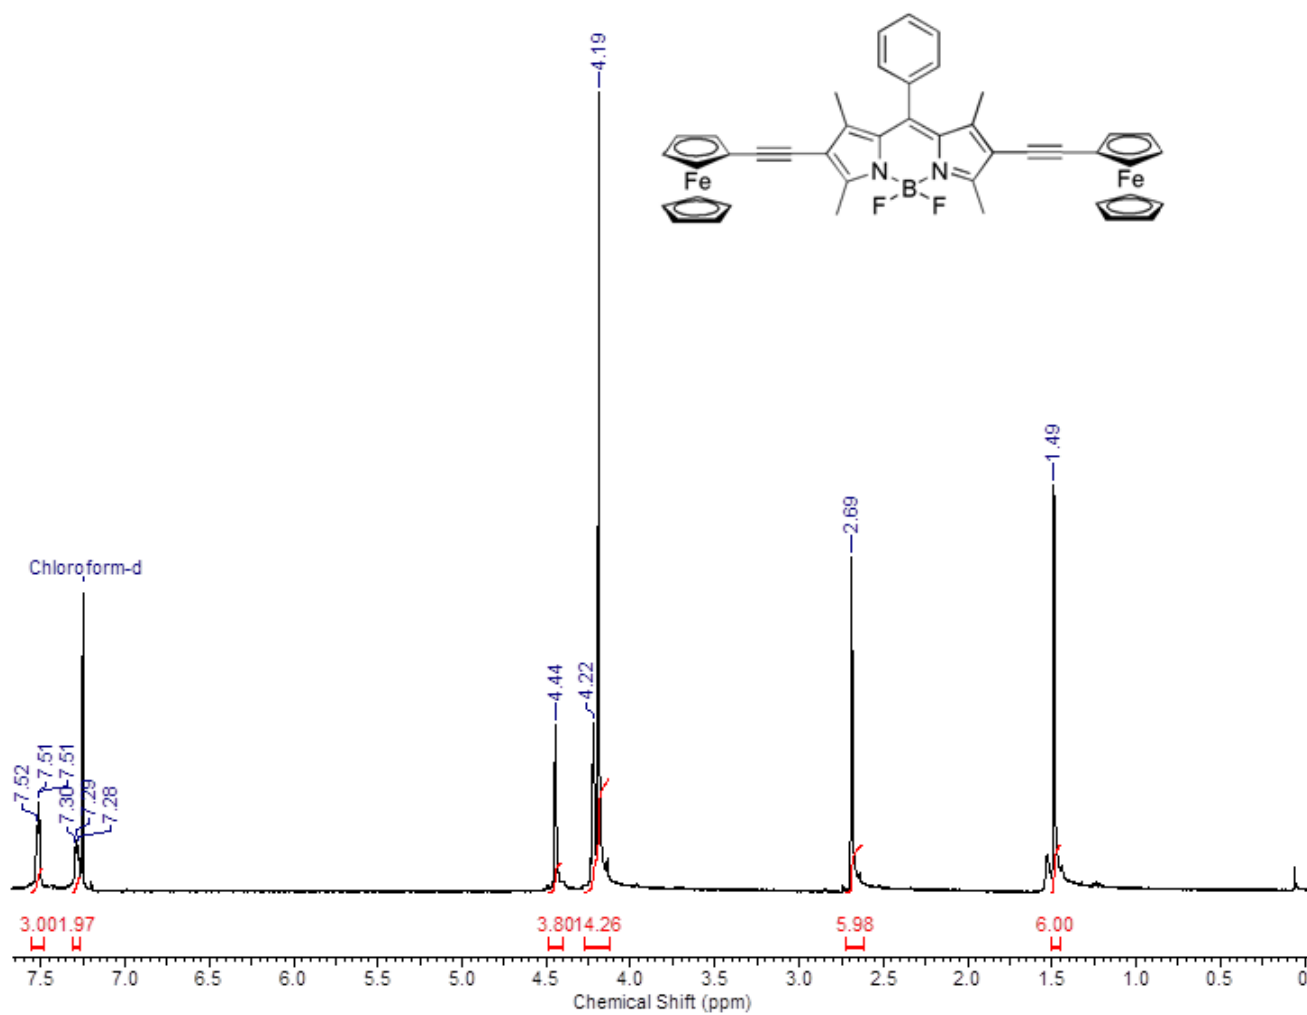

Figure S8.  $^1\text{H}$  NMR Spectra of **3a**.

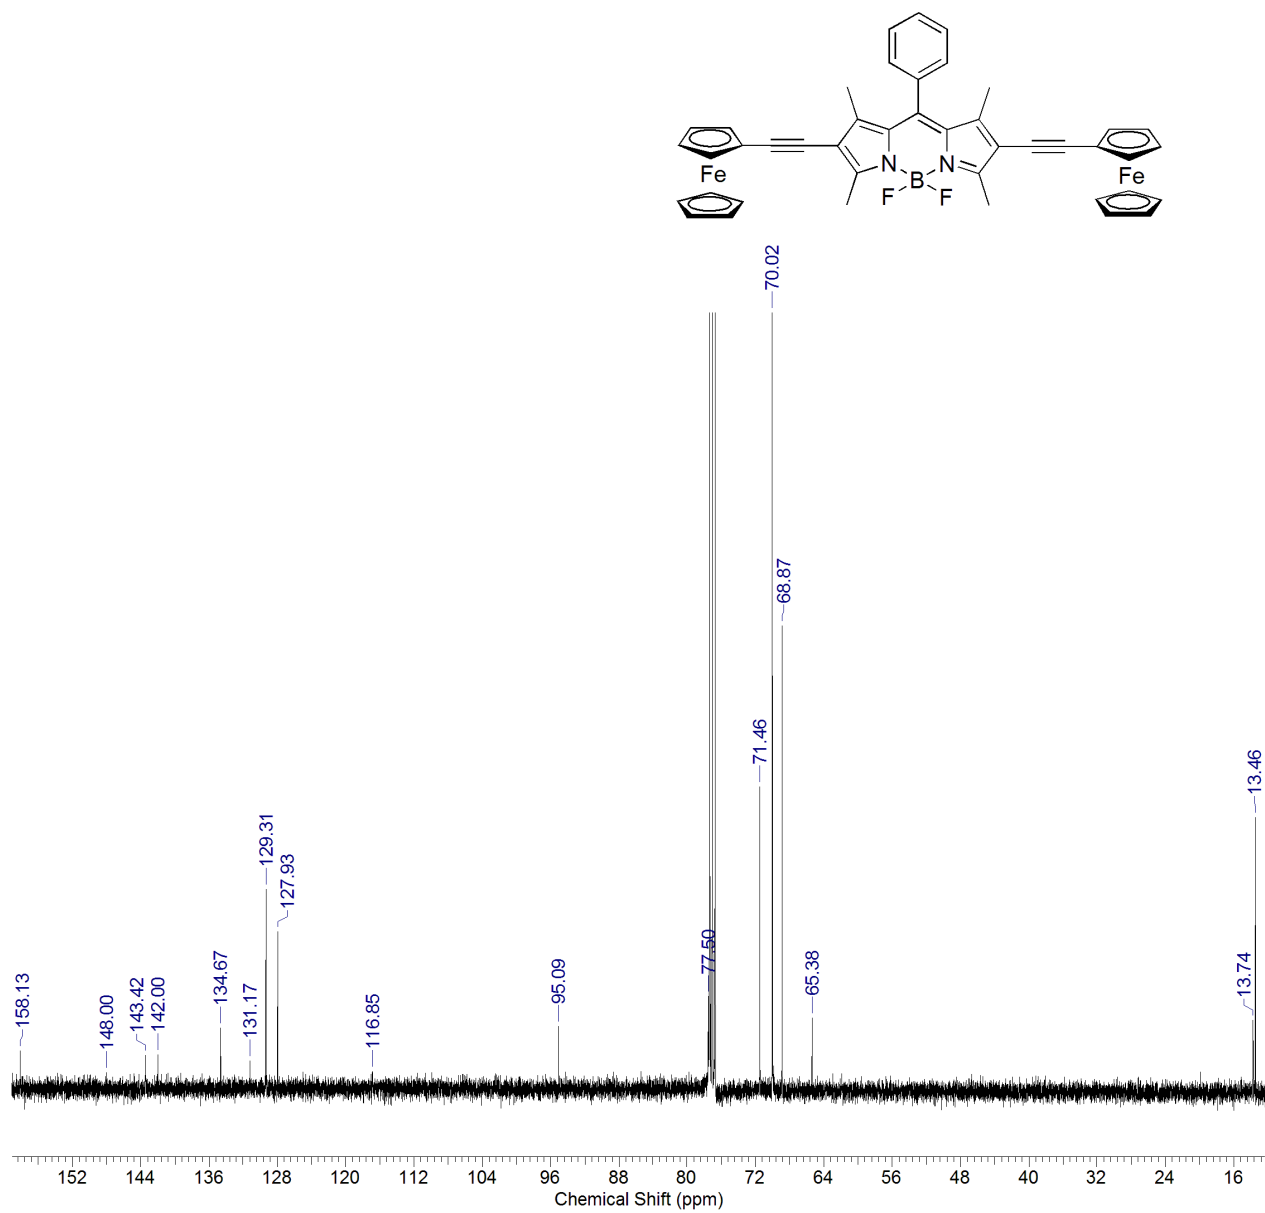

**Figure S9.**  $^{13}\text{C}$  NMR Spectra of **3a**.

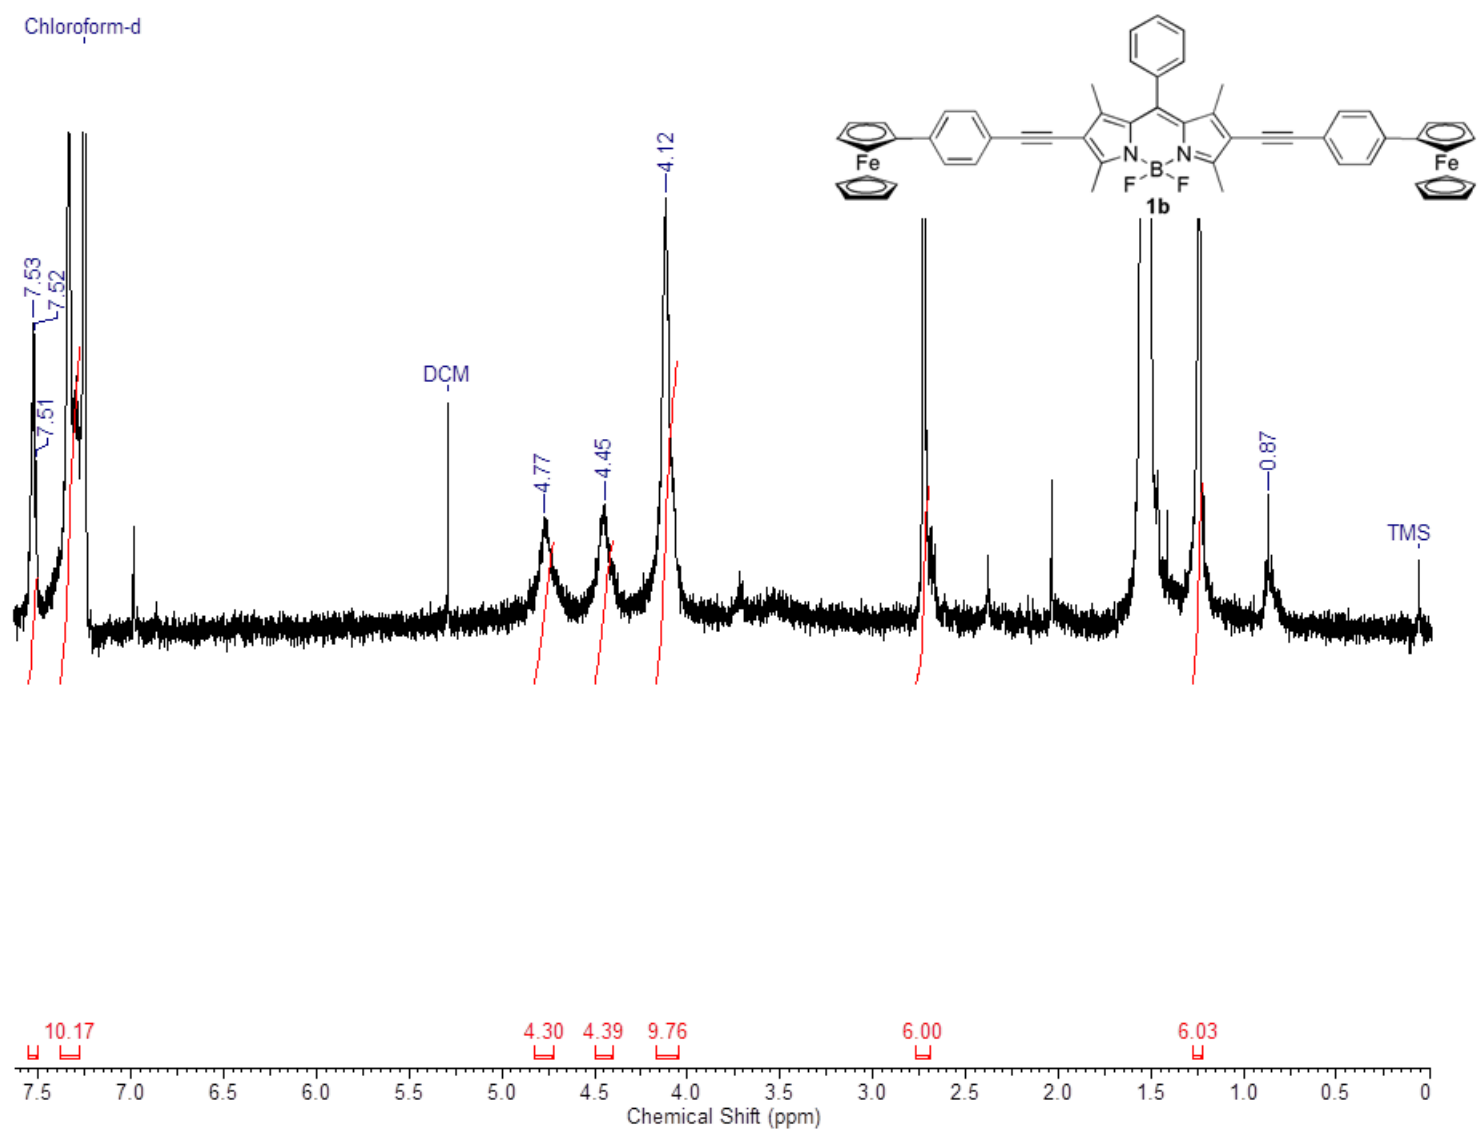

**Figure S10.**  $^1\text{H}$  NMR Spectra of **3b**.

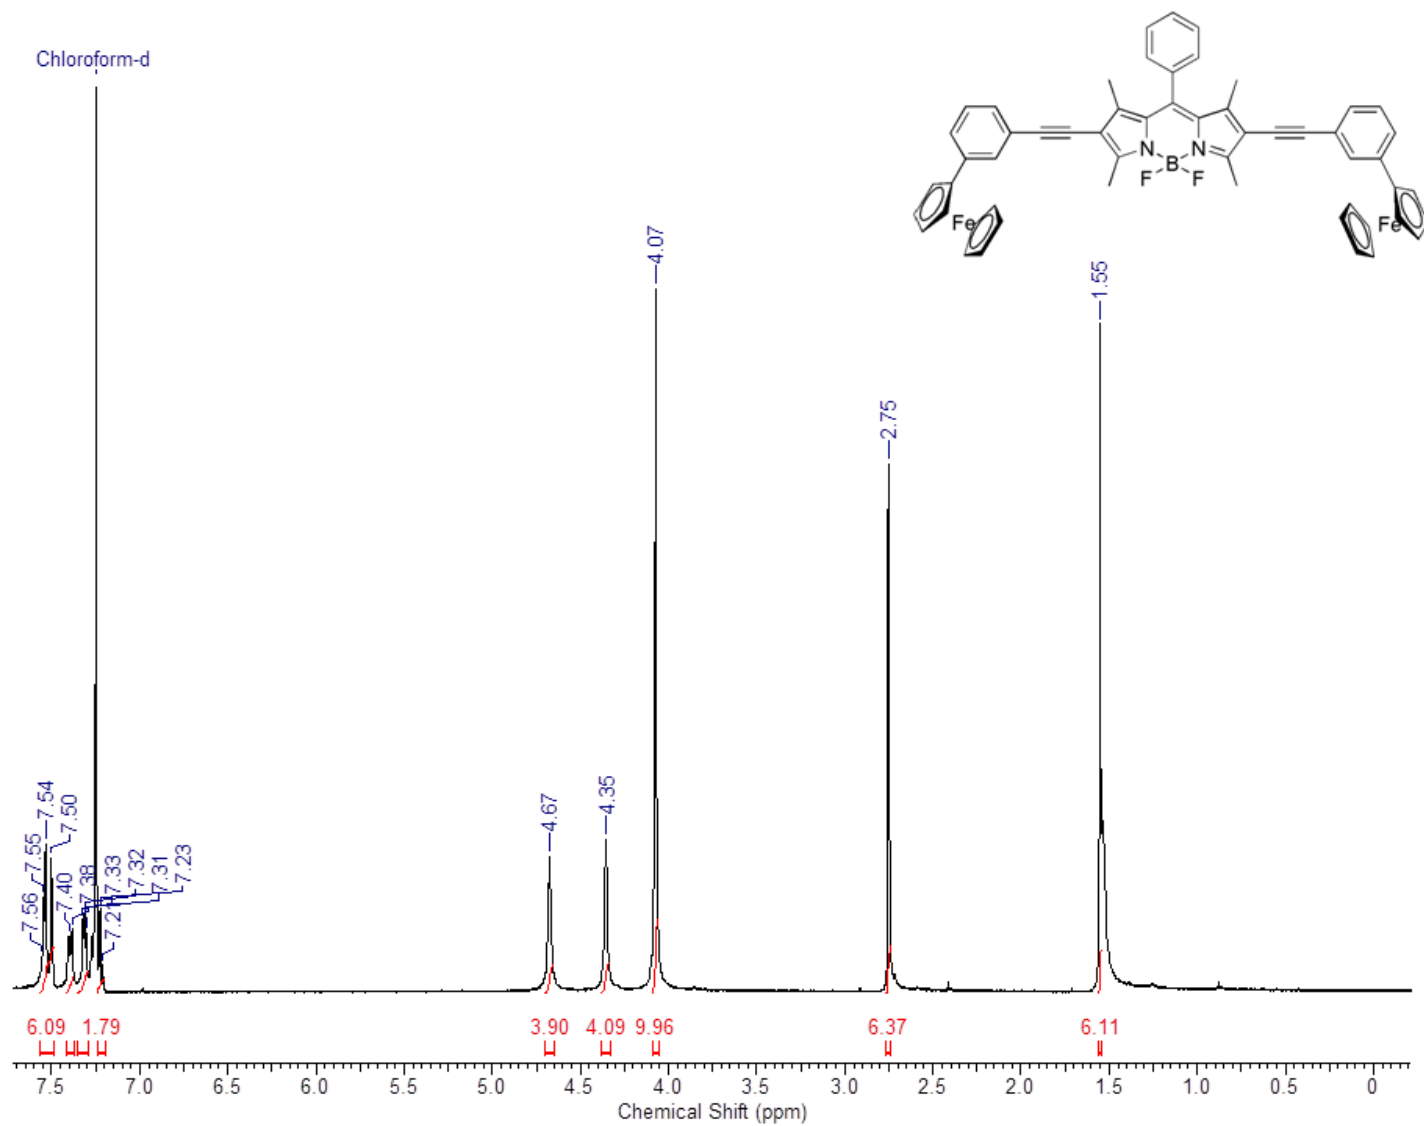

**Figure S11.**  $^1\text{H}$  NMR Spectra of **3c**.

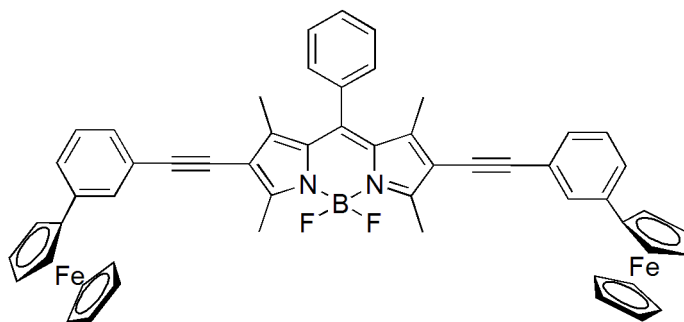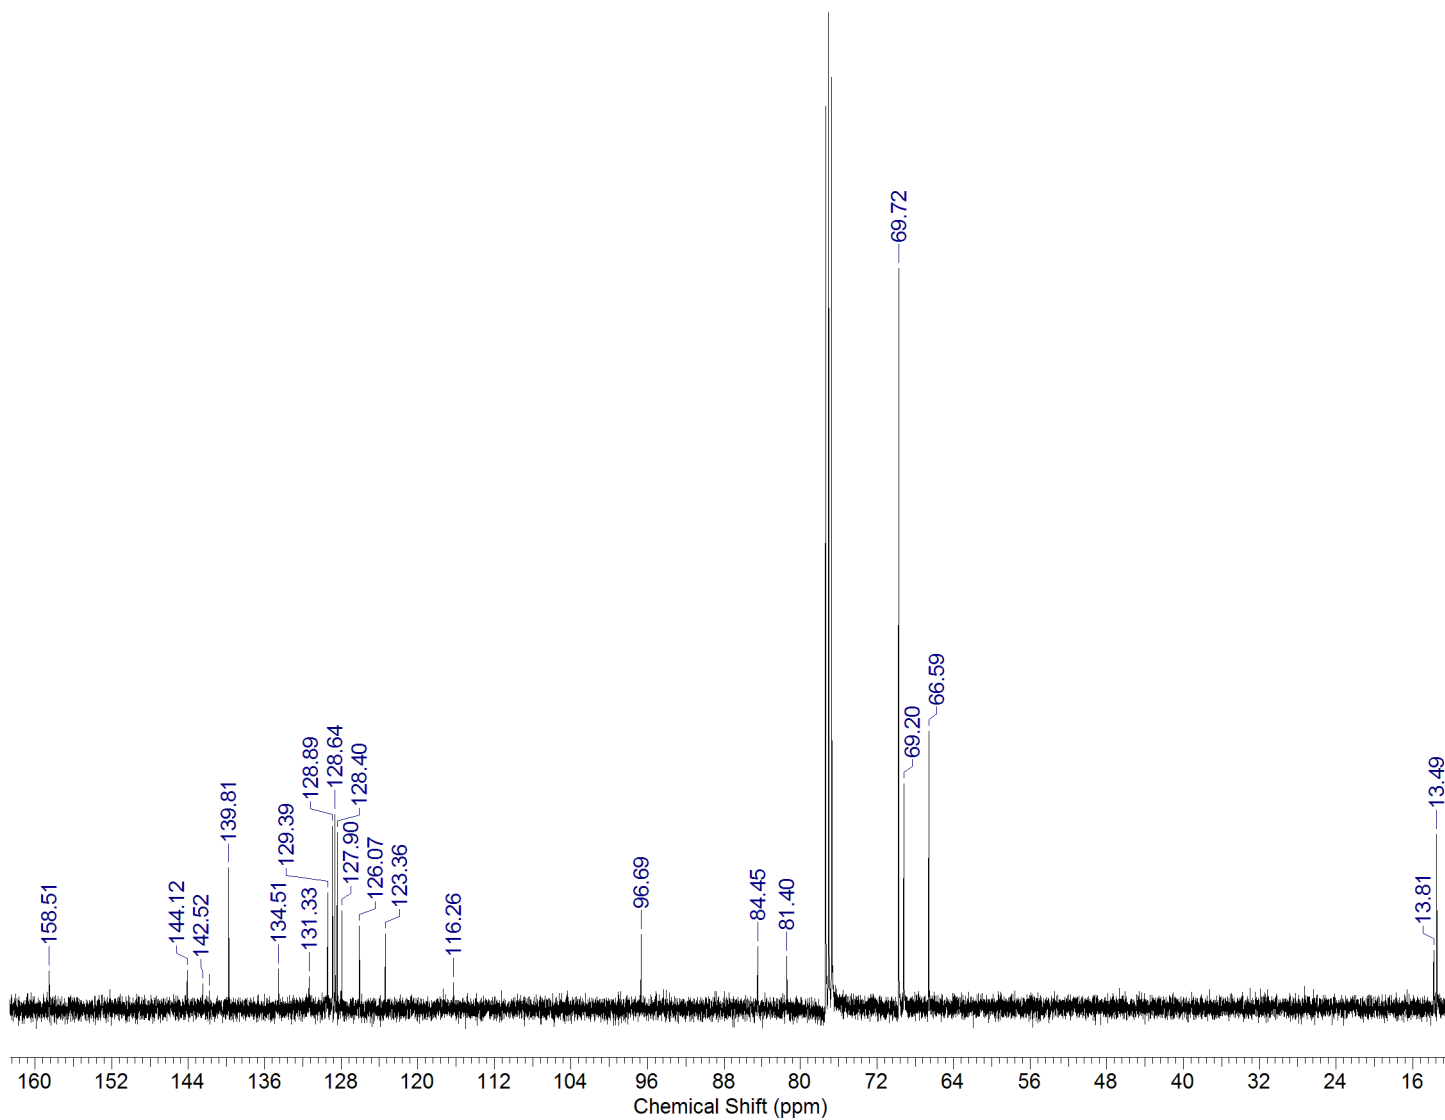

**Figure S12.**  $^{13}\text{C}$  NMR Spectra of **3c**.



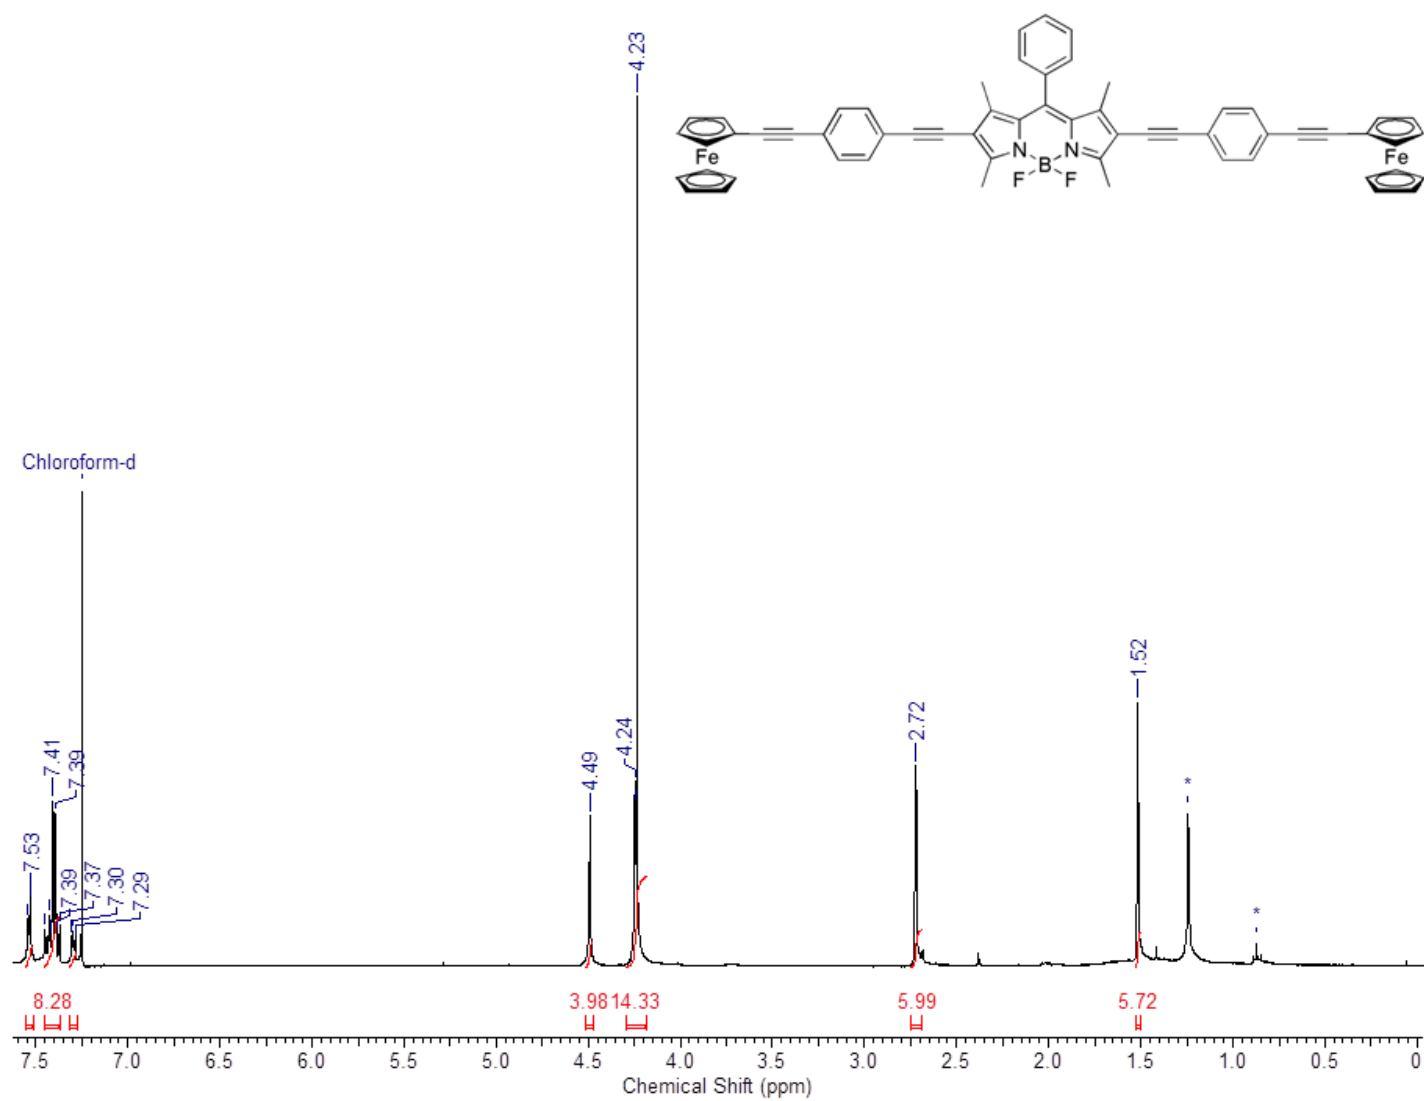

**Figure S13.** <sup>1</sup>H NMR Spectra of **3d**.

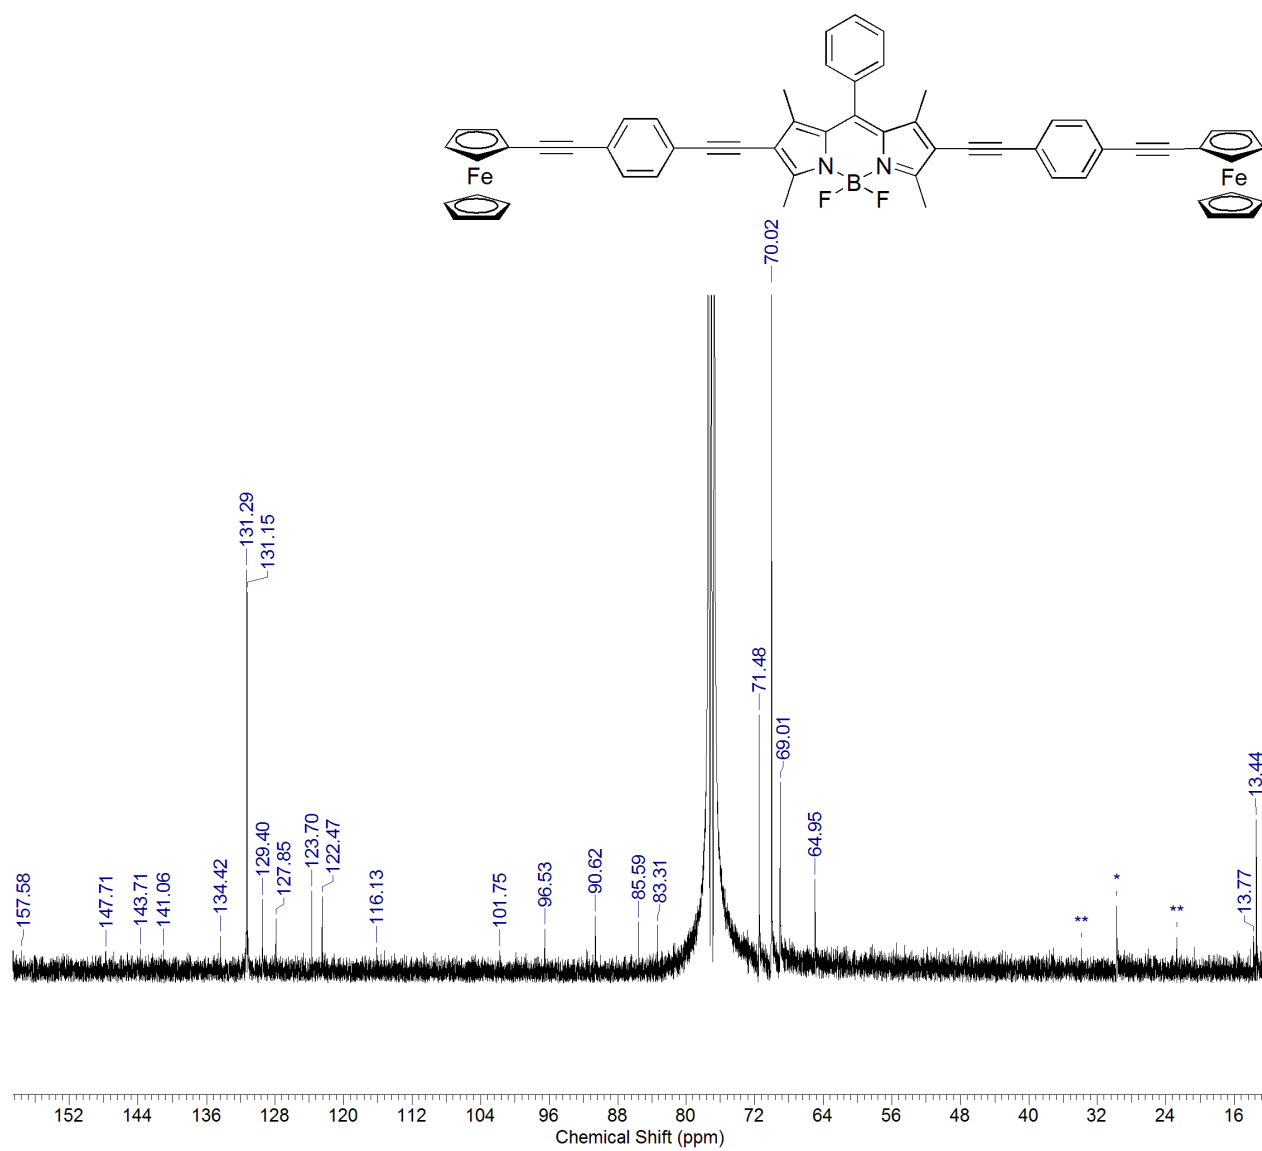

**Figure S14.**  $^{13}\text{C}$  NMR Spectra of **3d**.

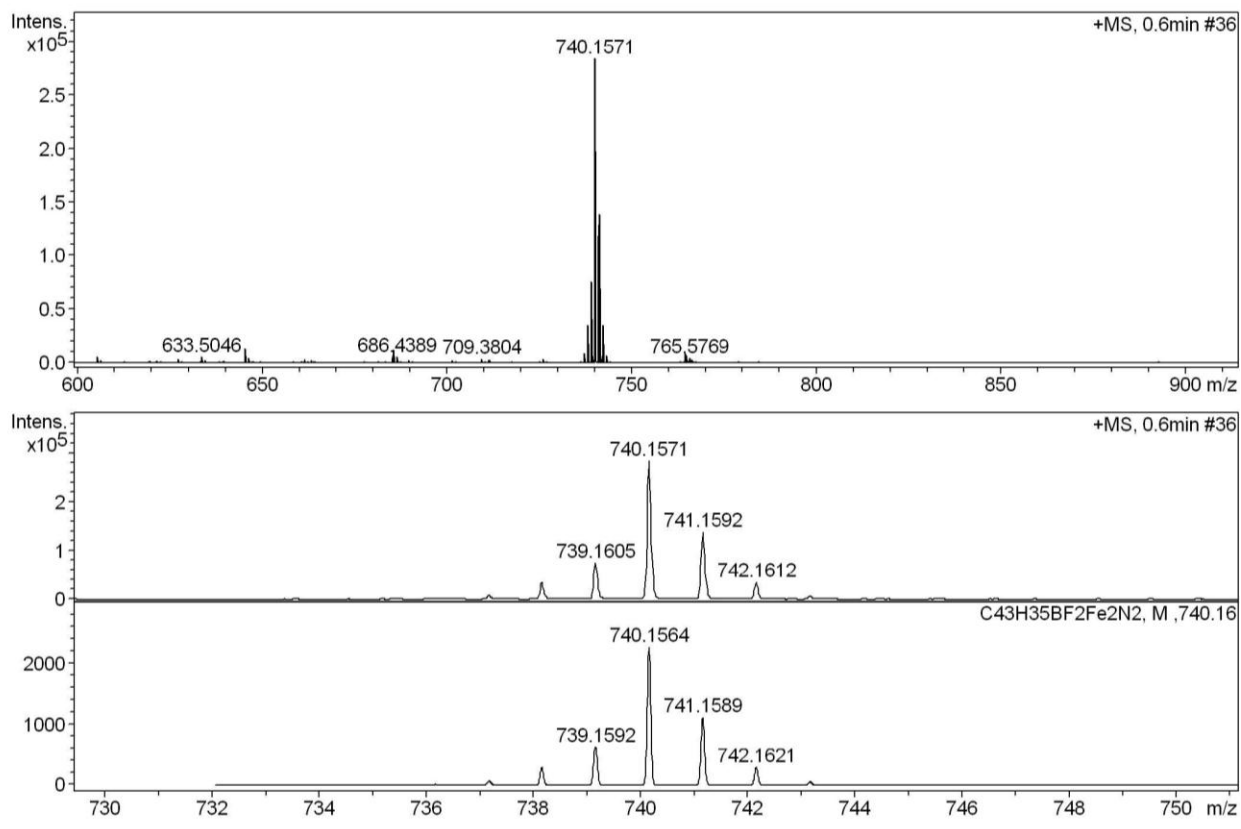

**Figure S15.** HRMS Spectra of **3a**.

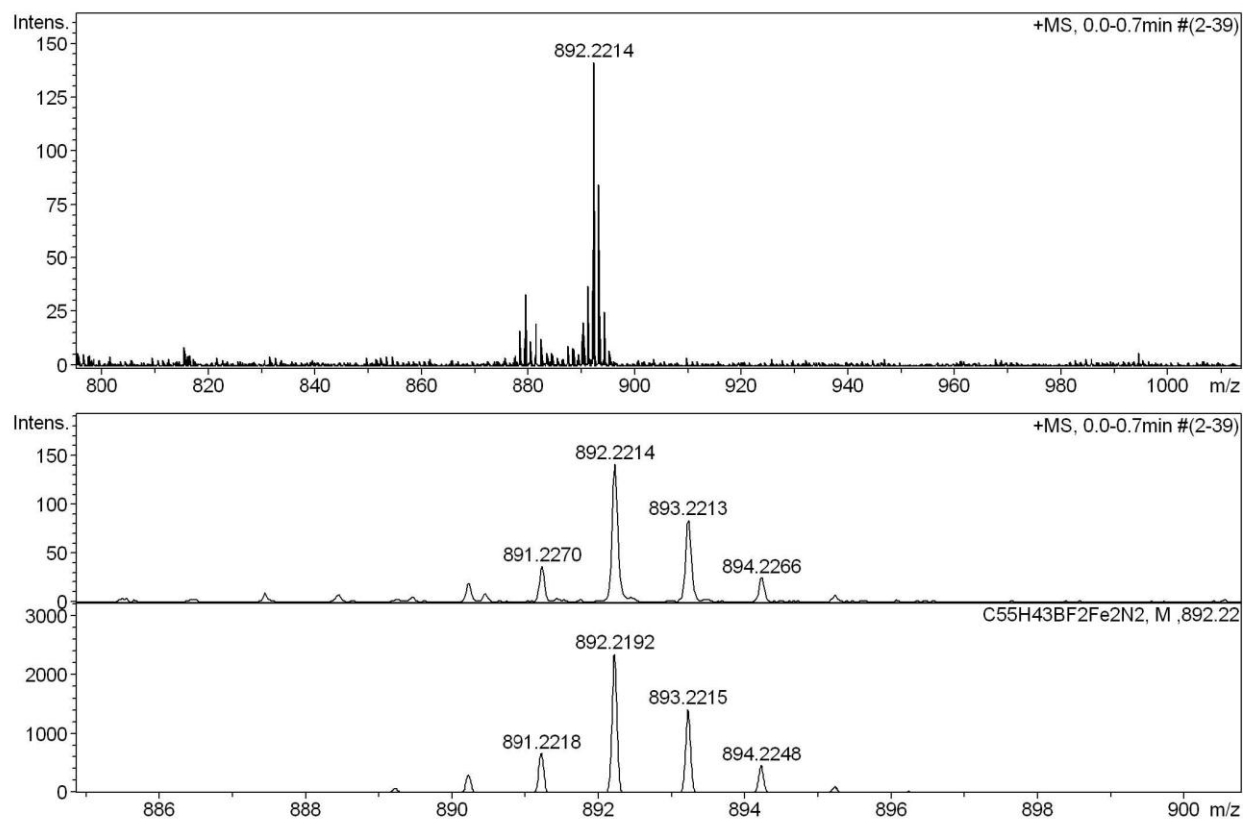

**Figure S16.** HRMS Spectra of **3b**.

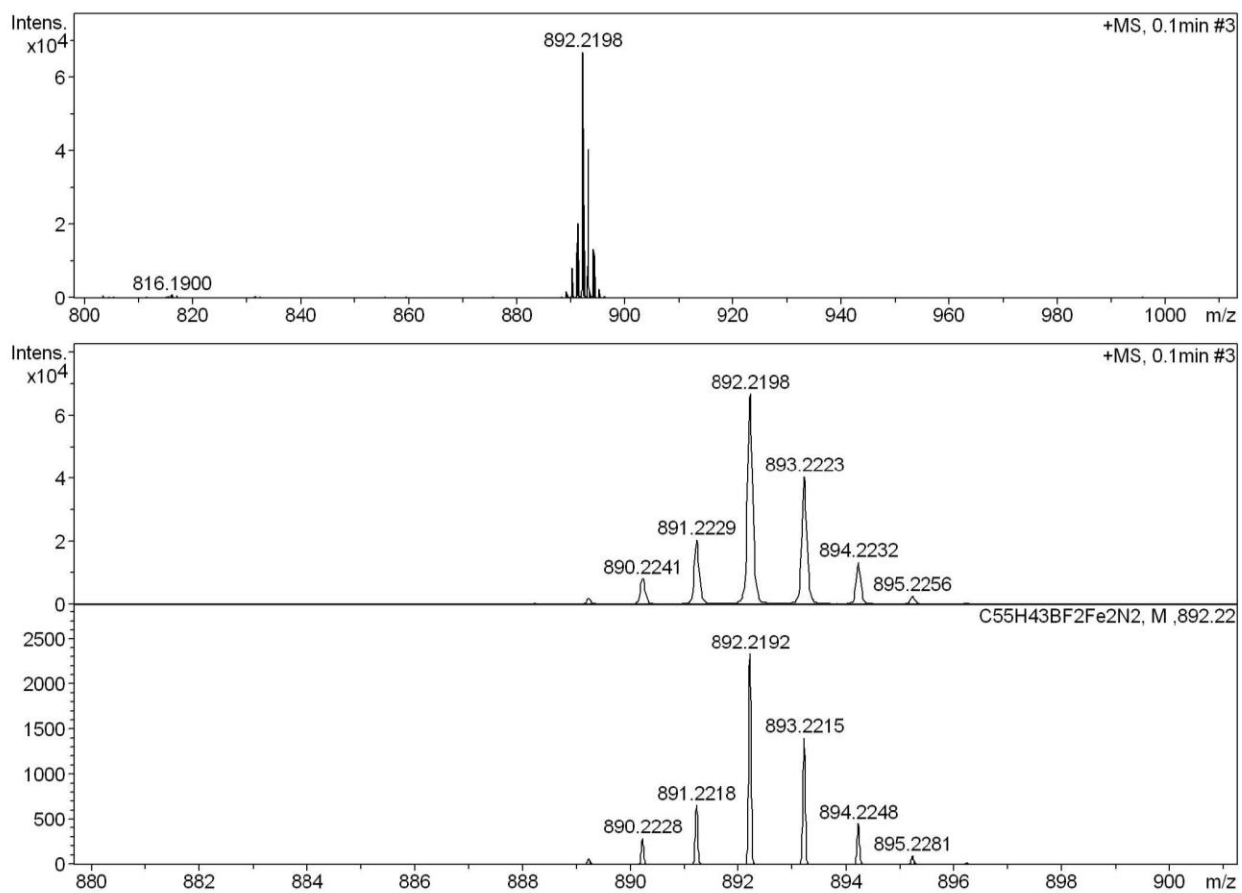

Figure S17. HRMS Spectra of 3c.

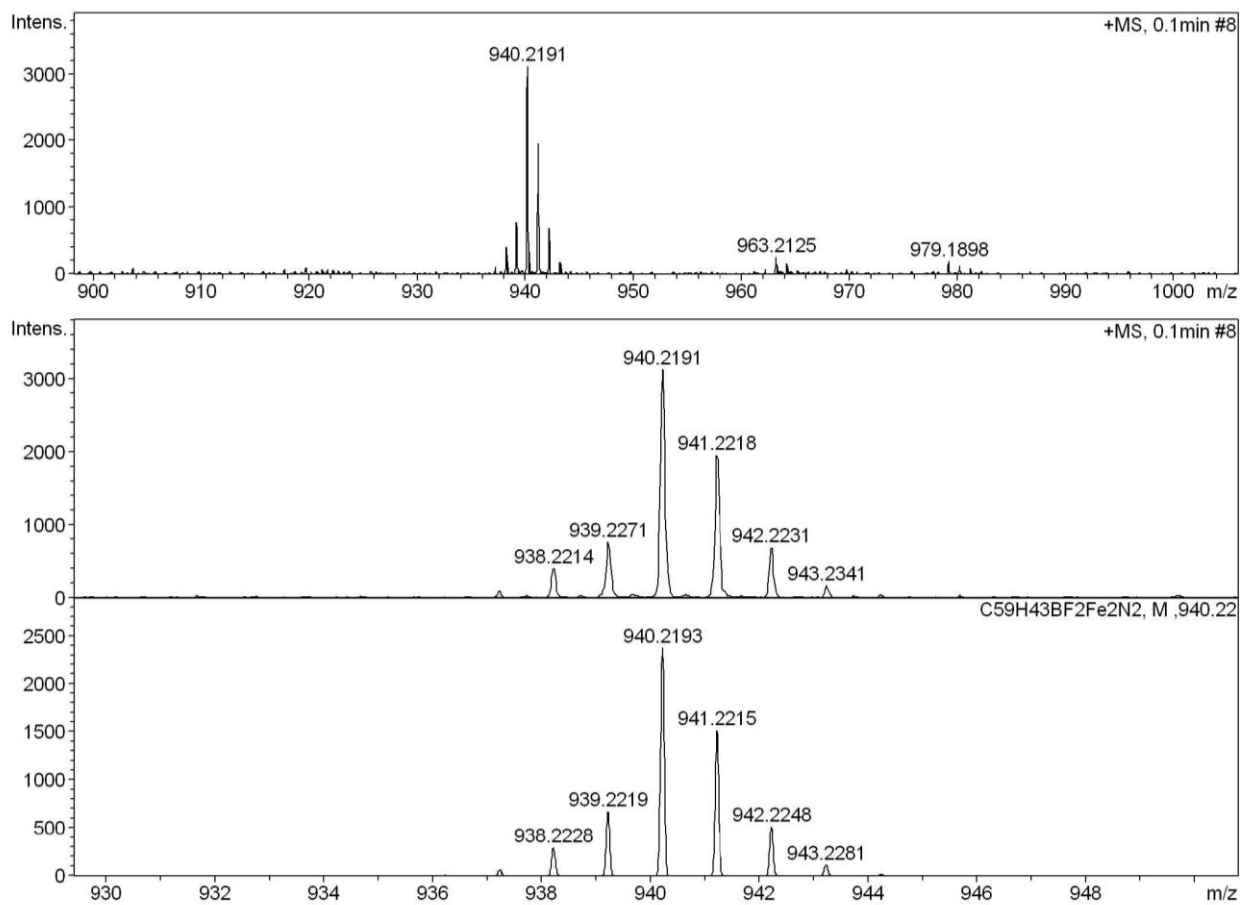

**Figure S18. HRMS Spectra of 3d.**
